# Supplementary material for: Charge-tagged N-heterocyclic carbenes
Source: Royal Society of Chemistry journal article supplement (doi:10.1039/c1ra00024a), 2011-01-01
Supplement: c1ra00024a.pdf [file c1ra00024a.pdf]

## Charge-Tagged *N*-Heterocyclic Carbenes

Yuri E. Corilo, Fabiane M. Nachtigall, Patricia V. Abdelnur, Gunter Ebeling, Jairton Dupont\* and Marcos N. Eberlin\*

ThoMSon Mass Spectrometry Laboratory  
Institute of Chemistry  
University of Campinas, UNICAMP 13083-970 Campinas SP Brazil  
[eberlin@iqm.unicamp.br](mailto:eberlin@iqm.unicamp.br)  
Phone/Fax: + 55.19 3521.3073

Supplementary Material

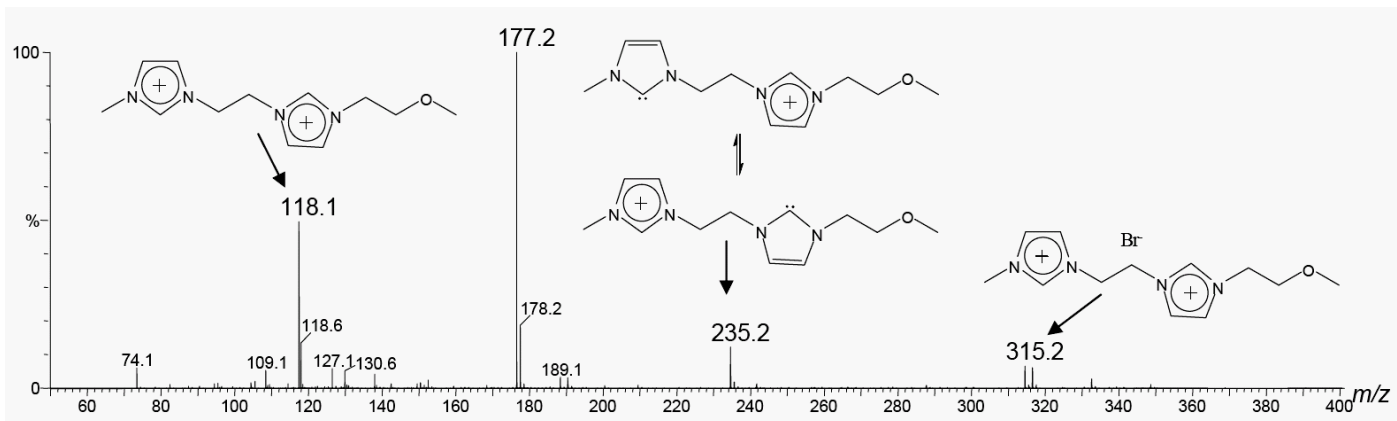

**Figure S1** - ESI(+)-MS of a methanolic solution of **3f**.Br<sub>2</sub>. Note the detection of the doubly charged imidazolium ion **3f**<sup>2+</sup> of *m/z* 118.1 (as well as the isotopologue ion of *m/z* 118.6) and the singly charged [3f.Br]<sup>+</sup> of *m/z* 313/315, and the unprecedented charge-tagged carbene **4f**<sup>+</sup> of *m/z* 219 directly sampled from solution (or formed via in-source CID of [3f.Br]<sup>+</sup>).

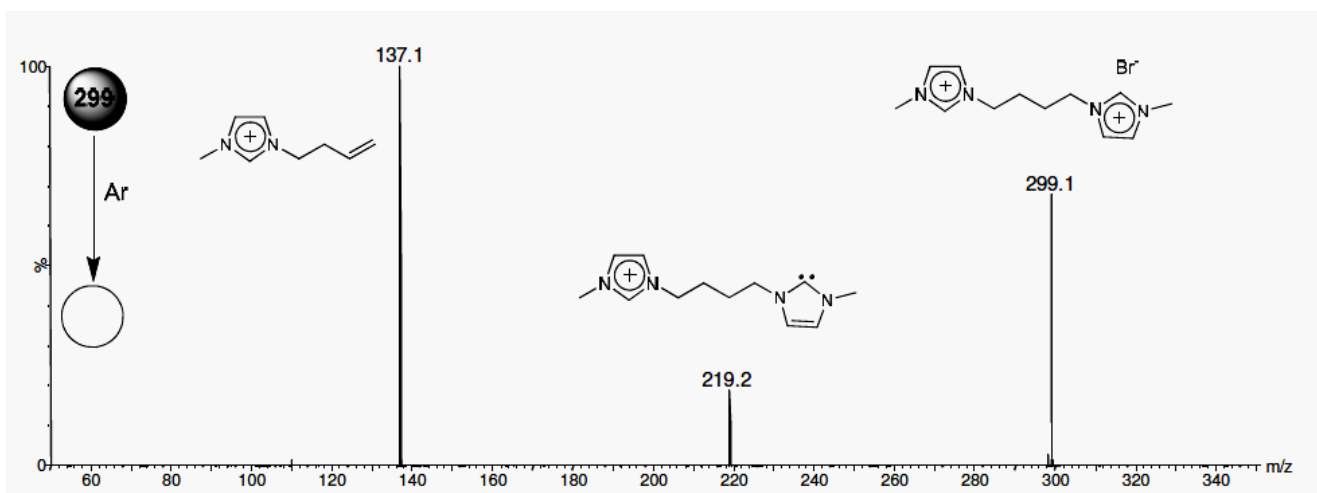

**Figure S2** – ESI(+)-MS/MS of  $[3a.Br]^+$  of  $m/z$  299.

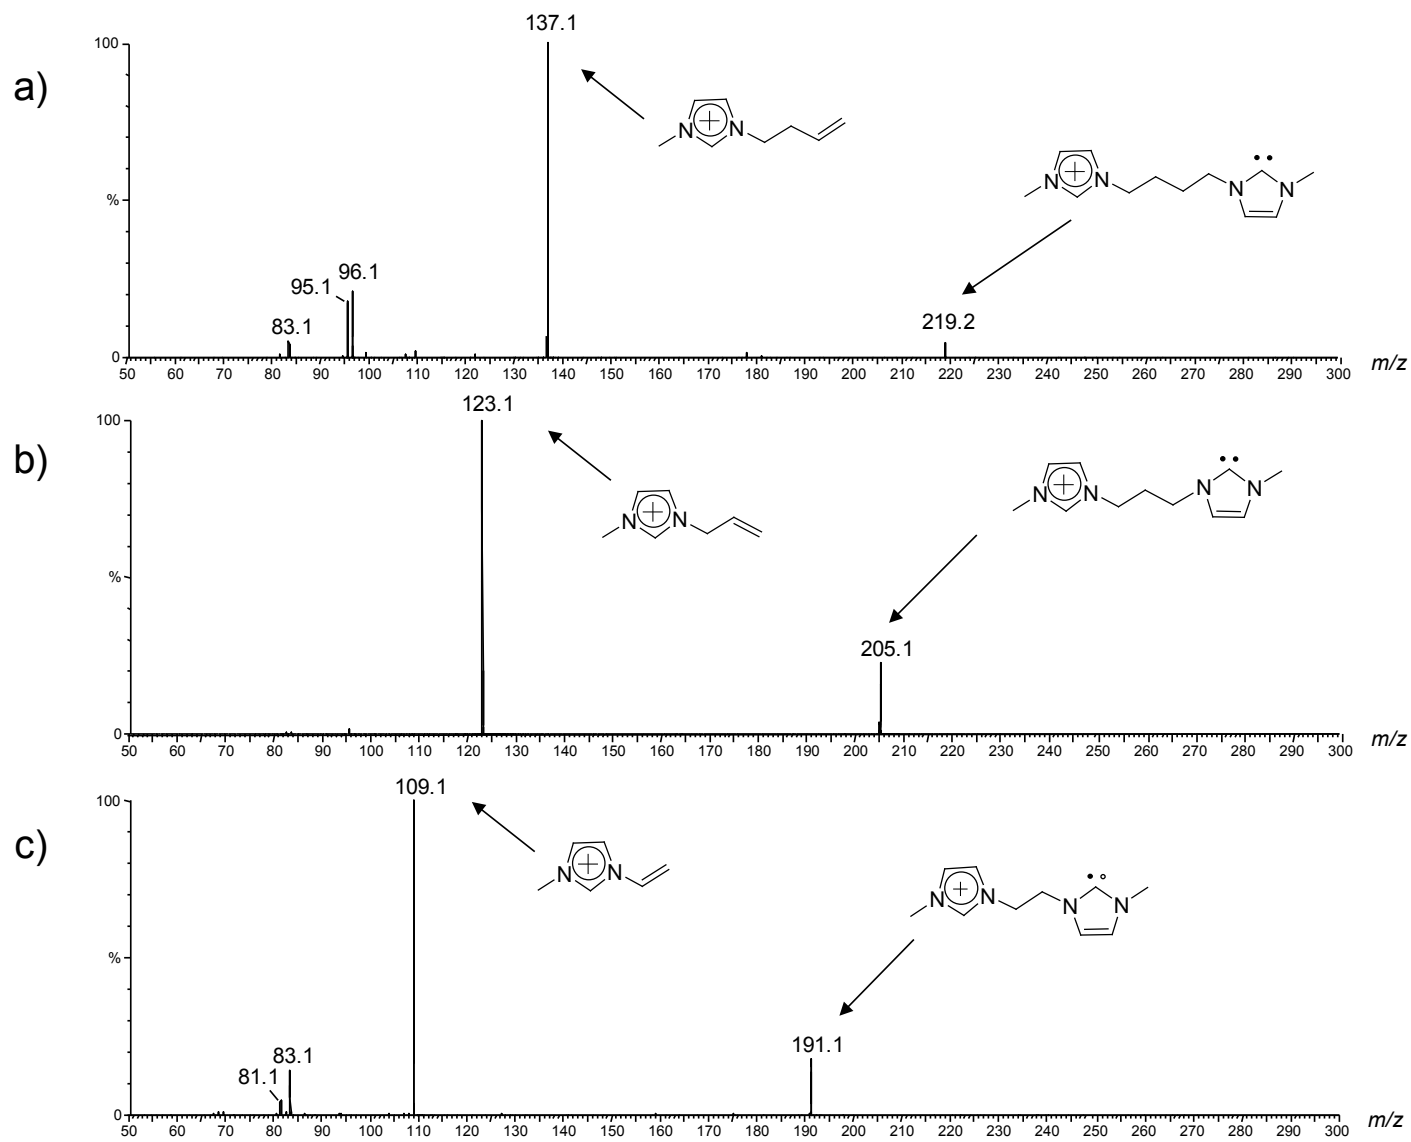

**Figure S3** – ESI(+)-MS/MS for the charge-tagged carbenes a) **4a**<sup>+</sup> of  $m/z$  219 b) **4b**<sup>+</sup> of  $m/z$  205 and c) **4c**<sup>+</sup> of  $m/z$  191.

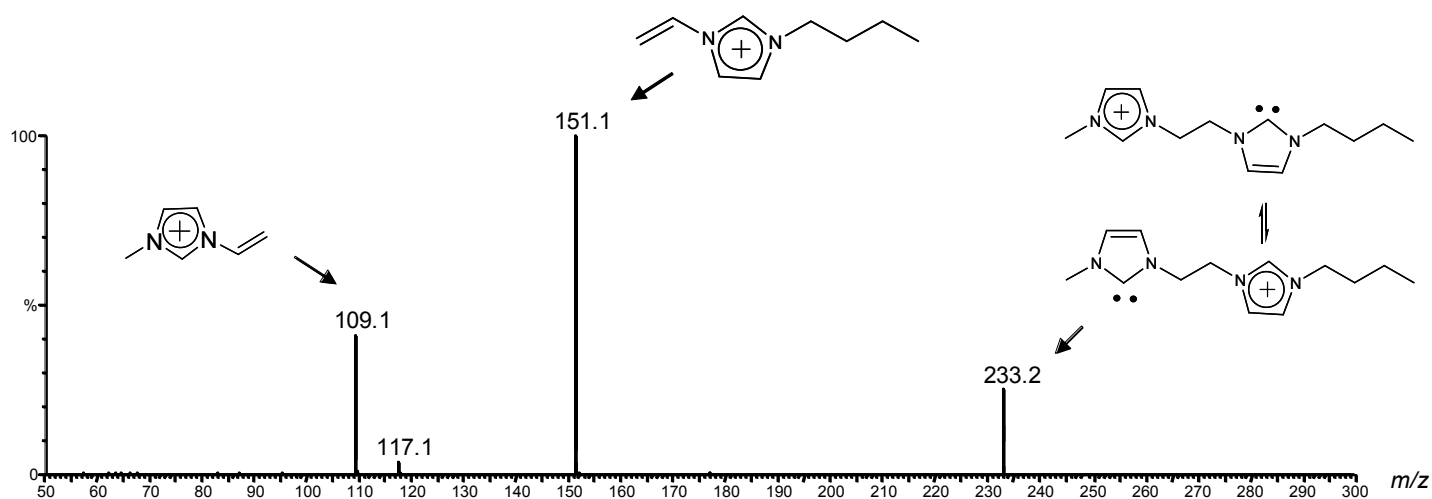

**Figure S4** - ESI(+)-MS/MS of the asymmetric charge-tagged carbene **4e<sup>+</sup>** of *m/z* 233.

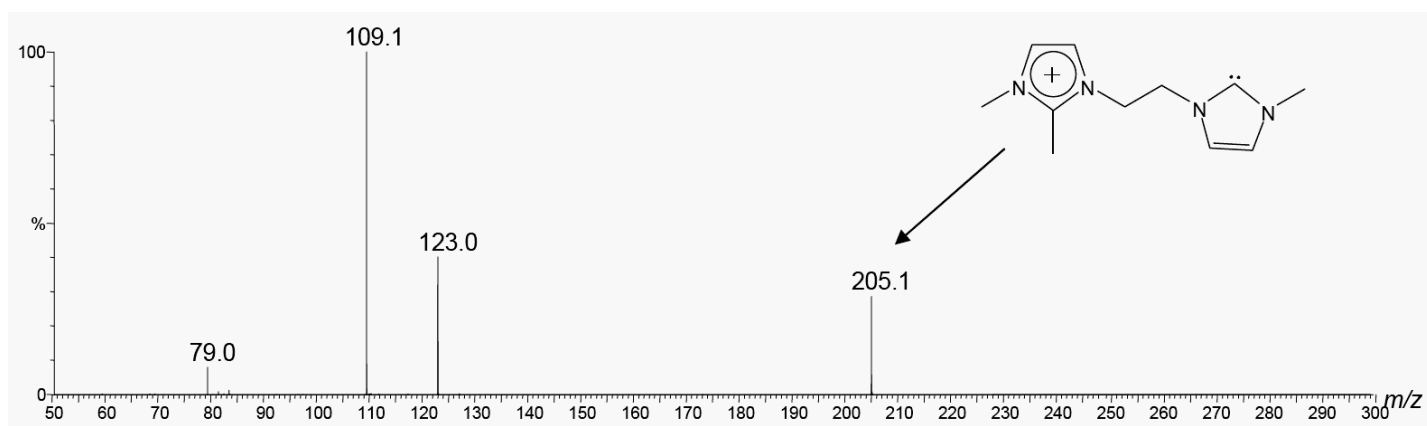

**Figure S5** – ESI(+)-MS/MS for the charge-tagged carbene **4d**<sup>+</sup> of *m/z* 205.

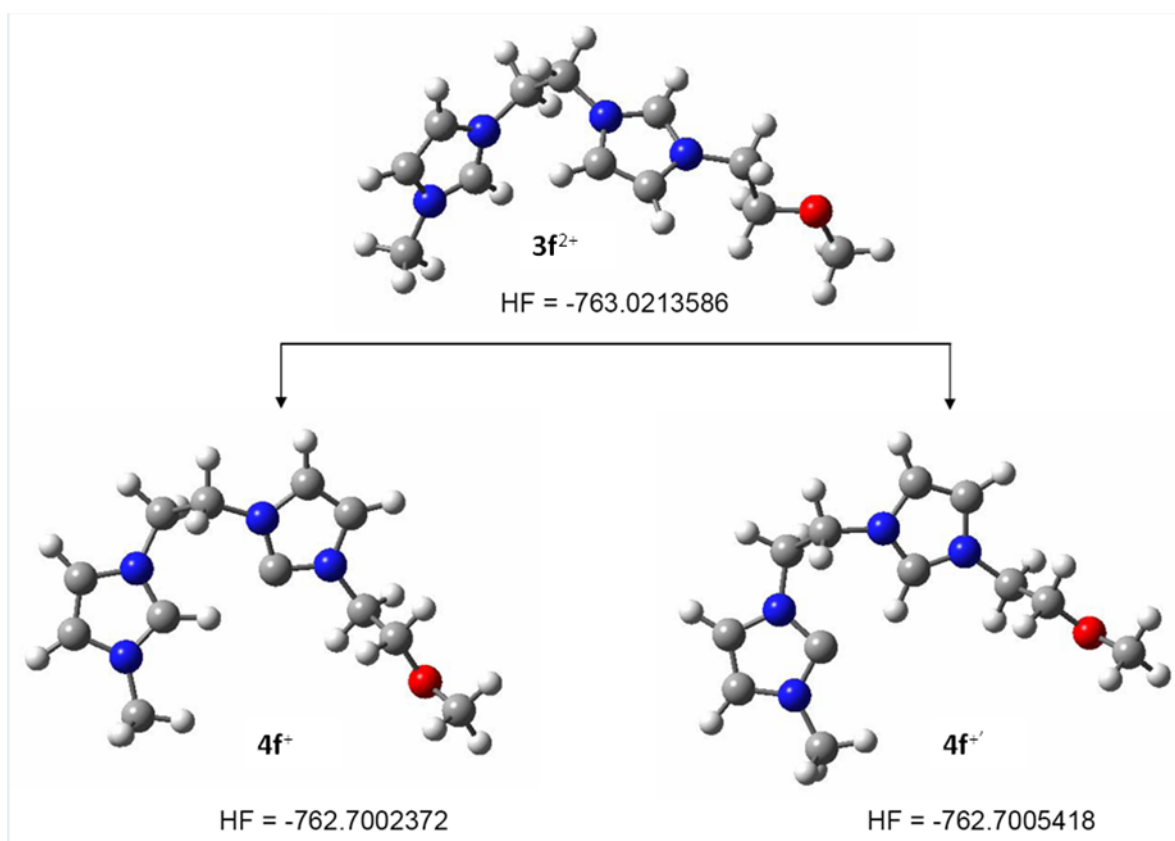

**Figure S6.** Beck3LYP 6-31G+(d,p) energies (HF energies in hartrees) and optimized structures for the isomeric  $4f^+$  and  $4f^{+'}$ .

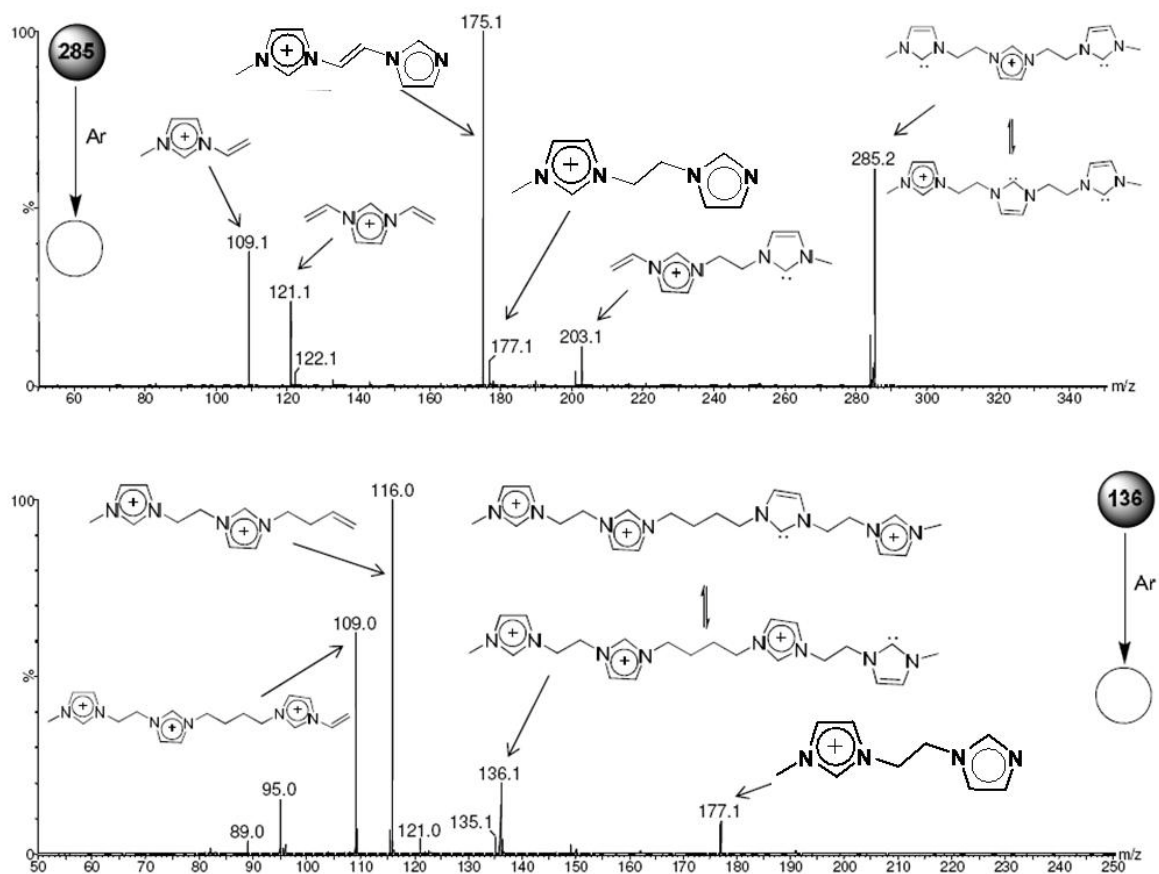

**Figure S7** – ESI(+)-MS/MS of a) the singly charged di-carbene **4h**<sup>+</sup> of *m/z* 285 and b) the triply charged mono-carbene **4j**<sup>3+</sup> of *m/z* 136.



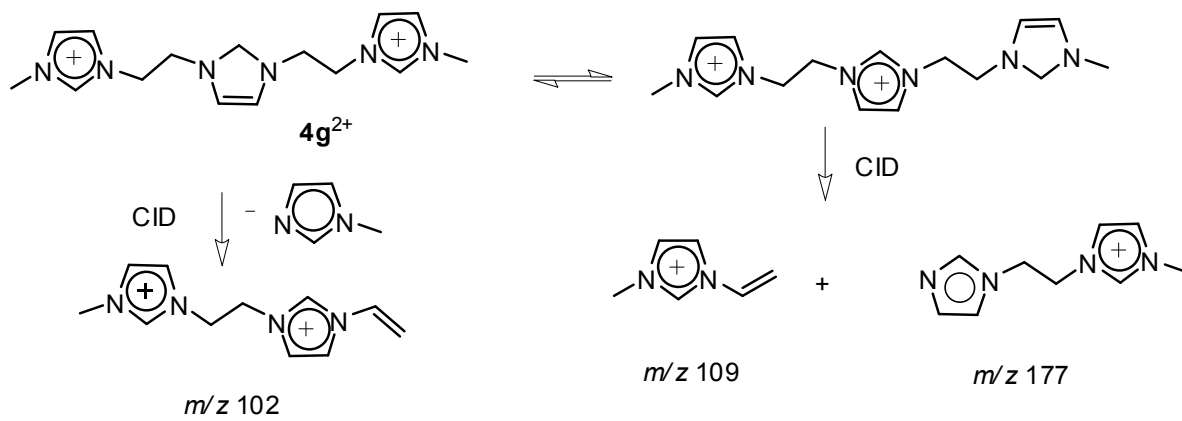

**Scheme S1**
